# Supplementary material for: O-Acyl isopeptide method: efficient synthesis of isopeptide segment and application to racemization-free segment condensation
Source: Royal Society of Chemistry journal article supplement (doi:10.1039/b903624e), 2009-01-01
Supplement: b903624e.pdf [file b903624e.pdf]

## Supporting Information

### ***O*-Acyl Isopeptide Method: Efficient Synthesis of Isopeptide Segment and Application to Racemization-Free Segment Condensation**

Taku Yoshiya, Hiroyuki Kawashima, Youhei Sohma, Tooru Kimura and Yoshiaki Kiso

Department of Medicinal Chemistry, Division of Medicinal Chemical Sciences, Center for frontier Research in Medicinal Science, 21st Century COE program, Kyoto Pharmaceutical University, Yamashina-ku, Kyoto 607-8412, Japan.

Fax: +81 75 591 9900

Tel: +81 75 595 4635

E-mail: kiso@mb.kyoto-phu.ac.jp

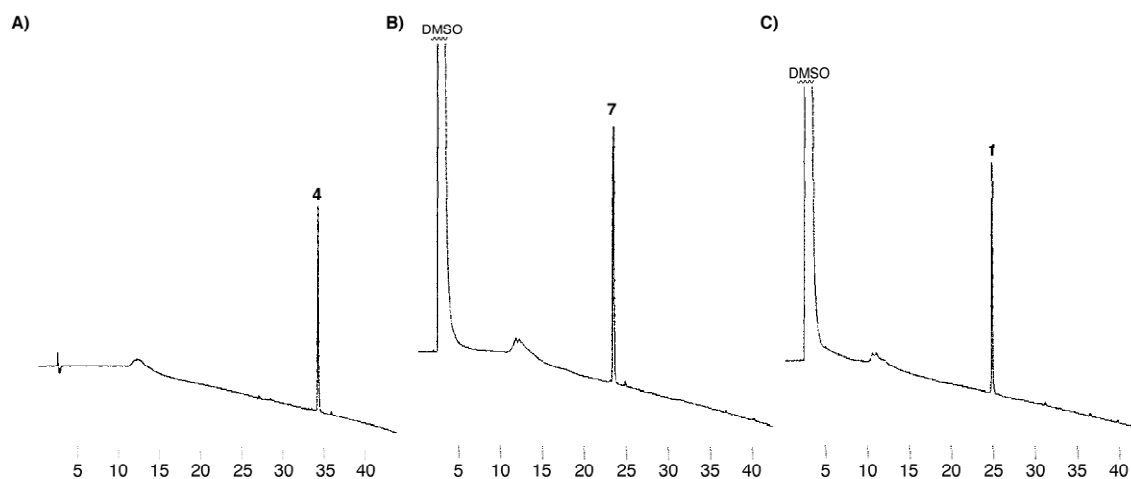

**Fig. S1** HPLC profile of (A) pure **4**, (B) pure **7** and (C) pure **1**. Analytical HPLC was performed using a C18 reverse phase column ( $4.6 \times 150$  mm; YMC Pack ODS AM302) with a binary solvent system: a linear gradient of  $\text{CH}_3\text{CN}$  (0–100%  $\text{CH}_3\text{CN}$ , 40 min) in 0.1% aqueous TFA at a flow rate of  $0.9 \text{ mL min}^{-1}$  ( $40^\circ\text{C}$ ), detected at 230 nm.

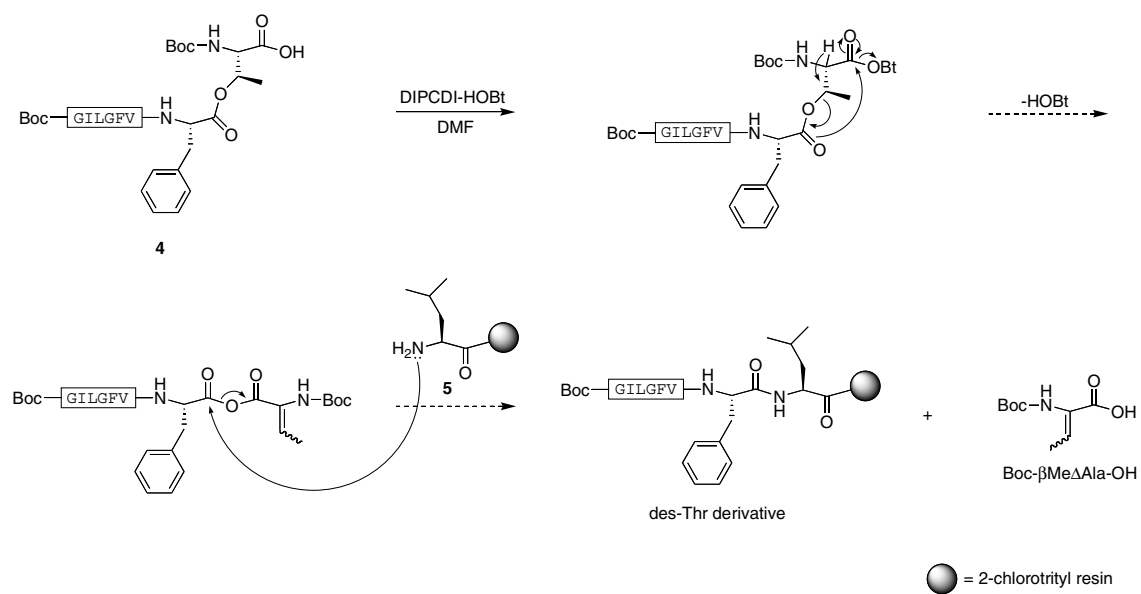

**Scheme S1.** Possible side reaction during C-terminal activation of the isopeptide segment 4. The proposed side reaction, resulting in des-Thr-6, was not observed in this study.

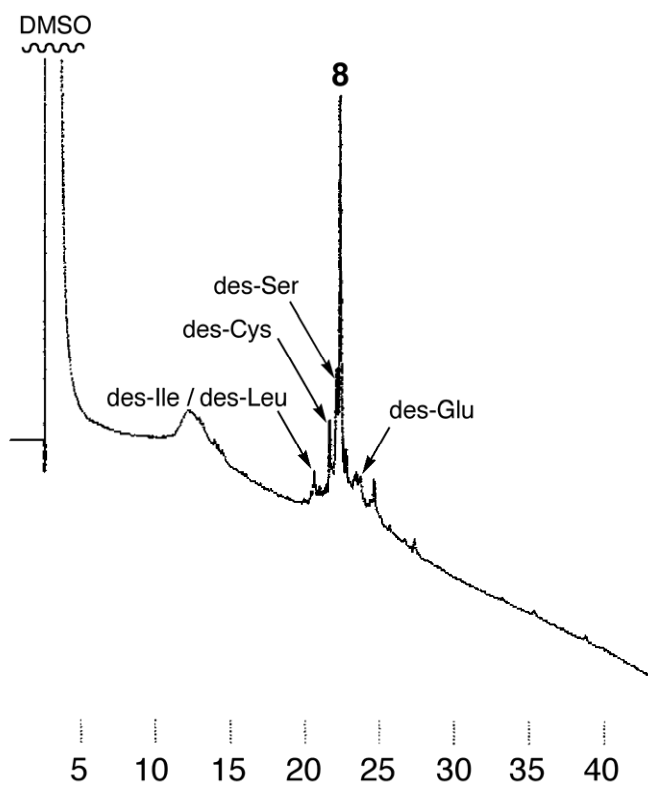

**Fig. S2** HPLC profile of crude **8** synthesized by conventional Fmoc-based SPPS. The byproducts were identified by MALDI-MS. HPLC conditions were similar to those described in Fig. S1.

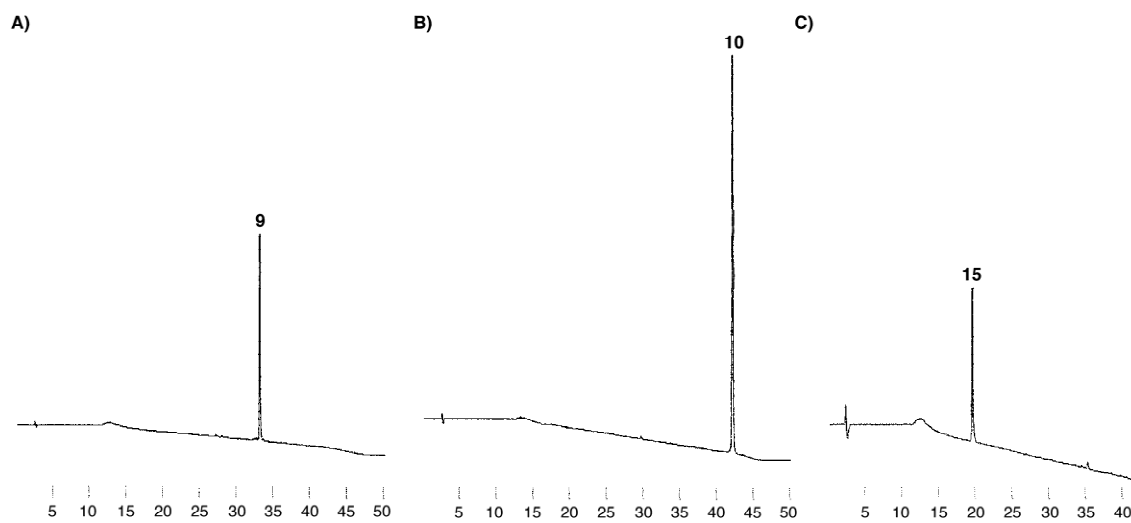

**Fig. S3** HPLC profiles of (A) pure **9**, (B) pure **10** and (C) pure **15**. HPLC conditions were similar to those described in Fig. S1.

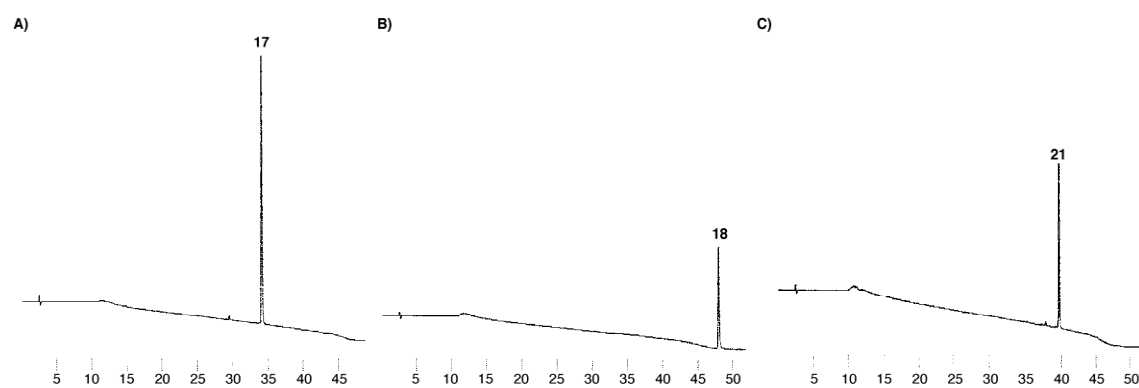

**Fig. S4** HPLC profile of (A) pure **17**, (B) pure **18** and (C) pure **21**. HPLC conditions were similar to those described in Fig. S1.
